# Supplementary material for: pROC: an open-source package for R and S+ to analyze and compare ROC curves
Source: Springer Nature journal article supplement (doi:10.1186/1471-2105-12-77), 2011-03-17

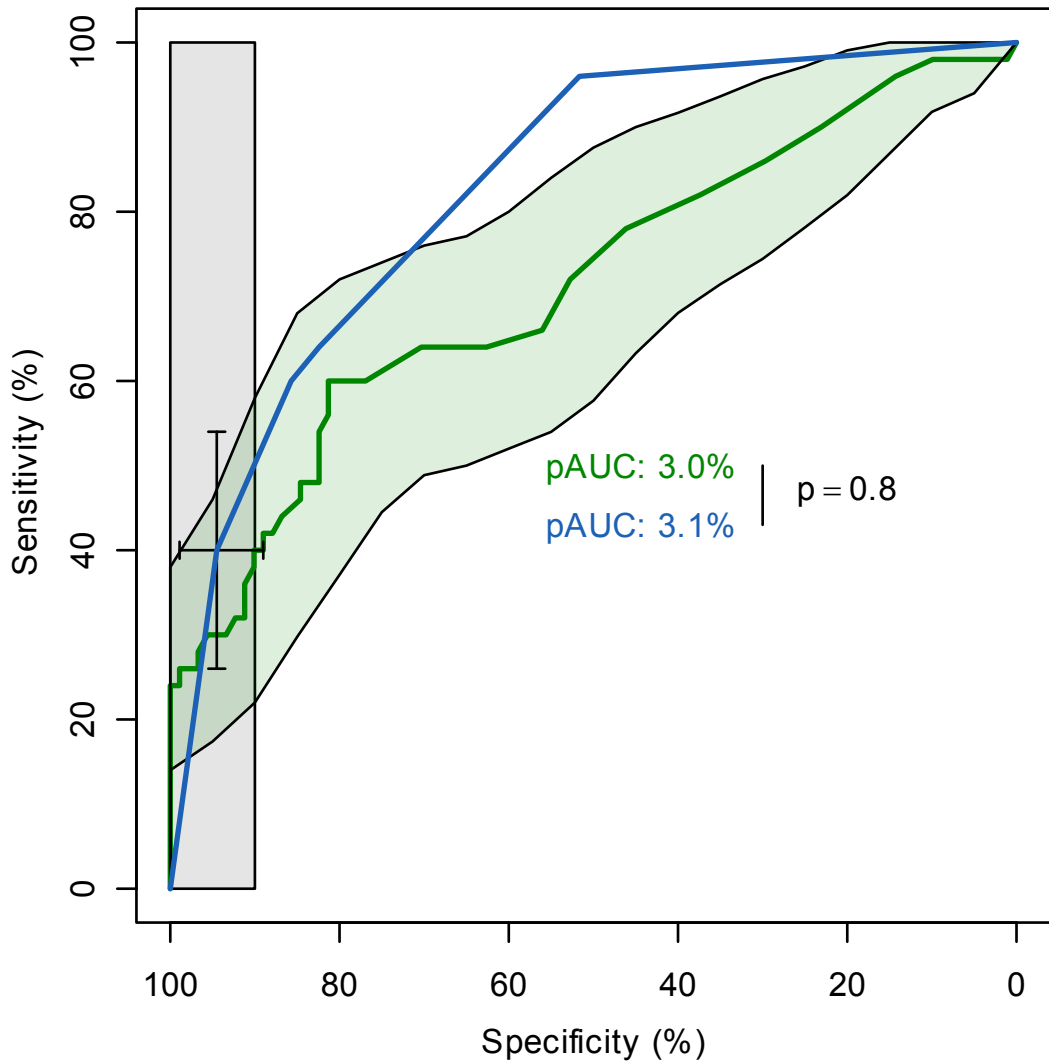

Supplement: 12859_2010_4448_MOESM6_ESM.pdf [file 12859_2010_4448_MOESM6_ESM.pdf]
